1 **Likely cross-border introductions of MPXV Clade I into the Republic of the**  
2 **Congo from the Democratic Republic of the Congo**

3  
4 Claude Kwe Yinda<sup>1\*</sup>, Félix Koukouikila-Koussounda<sup>2,3\*</sup>, Pembe Issamou Mayengue<sup>2,3</sup>,  
5 Golmard Reiche Elenga<sup>2</sup>, Benjamin Greene<sup>1</sup>, Missiani Ochwoto<sup>1</sup>, Ghislain Dzeret Indolo<sup>2</sup>,  
6 Yanne Vanessa Thiécesse Mavoungou<sup>2</sup>, Dachel Aymard Eyenet Boussam<sup>2</sup>, Bani Reize Vishnou  
7 Ampiri<sup>2</sup>, Chastel Claujens Mapanguy Mfoutou<sup>4</sup>, Yvanhe Deho Kianguébéni Mbouala<sup>4</sup>, Francine  
8 Ntoumi<sup>4,5</sup>, Jean-Médard Kankou<sup>2</sup>, Vincent J. Munster<sup>#1</sup>, Fabien Roch Niama<sup>#2,3</sup>

9  
10 <sup>1</sup> *Laboratory of Virology, Division of Intramural Research, National Institute of Allergy and*  
11 *Infectious Diseases, MT, USA.*

12 <sup>2</sup> *Laboratoire National de Santé Publique (LNSP), Brazzaville, Republic of the Congo*

13 <sup>3</sup> *La Fondation Congolaise pour la Recherche Médicale (FCRM), Brazzaville, Republic of the*  
14 *Congo*

15 <sup>4</sup> *Faculté des Sciences et Techniques, Marien NGOUABI University, Brazzaville, Republic of the*  
16 *Congo*

17 <sup>5</sup> *Institute of Tropical Medicine, University Hospital Tübingen, Tübingen, Germany*

18

19

20 *\*These authors contributed equally.*

21 *# Corresponding author*

22

23

24 **Abstract**

25

26 **Background:** Mpox virus (MPXV) Clade I is endemic in several central African countries and  
27 characterized by severe disease and high mortality. Since October 2023, a large-scale Mpox  
28 outbreak has emerged in the Democratic Republic of the Congo (DRC), with 22,477 cases and  
29 1,038 deaths reported as of May 26, 2024, and World Health organization (WHO) has declared  
30 mpox a public health emergency of international concern on August 14 2024. Twenty-three  
31 provinces in the DRC have been affected, 15 of which border another country, including the  
32 Republic of the Congo (RoC). The RoC is bordered by five of these affected provinces,  
33 increasing the risk of cross-border spread. In the RoC, Mpox cases have historically occurred in  
34 the endemic areas of the Likouala department in the north. Recently, suspected cases have  
35 emerged outside this region, and it is unclear if these cases are recent spillover events from the  
36 DRC outbreaks. Therefore, we performed molecular analyses of these cases in the RoC.

37 **Methods:** Samples were collected from suspected cases between January and April 29, 2024, in  
38 Likouala, Cuvette-Centrale, and Pointe-Noire. Blood samples, skin/oropharyngeal swabs or skin  
39 crusts were obtained for molecular diagnosis at the Laboratoire National de Santé Publique  
40 (LNSP), Brazzaville. MPXV sequences were obtained and analyzed using newly established  
41 Nanopore sequencing methodology and bioinformatic pipeline.

42 **Findings:** Phylogenetic analysis of sequences shows the clustering of MPXV sequences  
43 obtained from cases in RoC with sequences from the ongoing Mpox outbreak in the DRC. In  
44 addition, sequences from the RoC show multiple phylogenetic positioning suggesting the  
45 occurrence of multiple co-circulating strains in the human population.

46 **Interpretation:** The close genetic relatedness between sequences from RoC and those from  
47 DRC indicates a possible cross-border transmission of MPXV from DRC to RoC. These data

48 highlight the need for implementation of expanded surveillance in countries bordering DRC and  
49 RoC, in combination with control measures focused at containing the current outbreaks in DRC  
50 and RoC to prevent escalation into a larger-scale epidemic.

51 **Funding:** This research was supported by the Intramural Research Program of the National  
52 Institute of Allergy and Infectious Diseases (NIAID), National Institutes of Health (NIH).

53

54

55

56

57

58

59

60

61

62

63

64

65

66

67

68

69

70

## 71 **Introduction**

72 Mpox virus (MPXV) formerly known as monkeypox virus, is an enveloped, double stranded  
73 DNA virus of the *Poxviridae* family and the etiological agent of Mpox <sup>1</sup>. There are two known  
74 clades of MPXV: clade I which is endemic in central Africa and has been detected in the  
75 Democratic Republic of the Congo (DRC), the Republic of the Congo (RoC), the Central African  
76 Republic, Cameroon and Gabon, and clade II which is endemic in West Africa <sup>2</sup>. Mpox typically  
77 presents with a 2–4-day prodrome followed by the appearance of a vesiculo-papular rash and is  
78 combined with fever and lymphadenopathy <sup>3</sup>. Case fatality rates (CFRs) across previously  
79 reported Mpox outbreaks have averaged 11% for clade I MPXV and <4 % for clade II MPXV <sup>4,5</sup>.  
80 In May 2022, Clade Iib MPXV caused the largest known multinational human outbreak of Mpox  
81 with over 92,590 laboratory-confirmed cases, mostly outside of historically endemic regions in  
82 West Africa <sup>6</sup>. The Clade Iib MPXV outbreak appears to be largely driven by sustained human-  
83 to-human transmission via male-to-male sexual or intimate contact (MSM). This Mpox outbreak  
84 in non-endemic countries resulted in the declaration of a public health emergency of  
85 international concern by the World Health Organization (WHO) in 2022 <sup>6</sup>.  
86 The RoC, a country of 342,000 km<sup>2</sup> with an estimated population size of 5.7 million inhabitants,  
87 is endemic for Clade I MPXV in the northern part of the country <sup>7,8</sup>, and since the first confirmed  
88 cases reported in 2003 <sup>9</sup> small self-limiting outbreaks have been reported over the last couple of  
89 years. This historic occurrence of small outbreaks in RoC is in contrast with the continuous  
90 increase in cases over the last decades, and the surge of cases throughout most of DRC reported  
91 over 2023 and 2024 <sup>10-13</sup>. Genomic analysis revealed a novel distinct MPXV clade now  
92 designated as Clade Ib, divergent from previously sequenced Clade I strains circulating in  
93 eastern DRC <sup>10</sup>. The recent increase in Clade I Mpox cases suggest an increase in human-to-

94 human transmissibility for Clade I, similar to what has been reported for Clade IIb. There are  
95 clear similarities between the emergence of Clade IIb and Clade I, with sexual contact  
96 transmission now being reported for Clade I in DRC <sup>14</sup>. However, whereas the clade IIb MPXV  
97 circulated almost exclusively within the MSM population, the Clade I MPXV displays broad  
98 circulation throughout the human population <sup>15 14</sup>. Due to this upsurge of Mpox in the DRC and  
99 cases outside Africa <sup>16</sup>, the WHO on August 14, 2024 declared Mpox a public health emergency  
100 of international concern for the second time <sup>17</sup>.

101 In March 2024, the first Mpox cases were reported outside the historic endemic areas in the RoC  
102 and it is not clear if these cases are recent spillover events from the DRC outbreaks. Here we  
103 describe the sequencing analyses of samples obtained from the Mpox cases in RoC at the  
104 Laboratoire National de Santé Publique (LNSP), Brazzaville.

105

## 106 **Methods**

### 107 **Study design**

108 We performed a cross-sectional descriptive study of genomic sequences analyses on MPXV real-  
109 time PCR confirmed samples collected in different sanitary departments in the RoC from  
110 January to April 2024. MPXV positive samples were consecutively selected regardless of the  
111 cycle threshold (Ct) values. Further selection criteria included the quantity of the remaining  
112 biological sample after real-PCR screening and the availability of the filled data collection form.  
113 The study took place at the molecular biology unit of the LNSP, Brazzaville.

### 114 **Sampling and data collection**

115 Mpox is one of the 18 diseases under surveillance in the RoC. In 2022, the Ministry of Health  
116 and Population set a passive surveillance program for Mpox across the Country. Under this

117 program, focal points were trained for recognition of suspected cases following criteria for Mpox  
118 suspicious set by the Direction de l’Epidémiologie et de la Lutte contre la Maladie (DELM),  
119 sampling, data collection using a national standardized form established by the DELM and  
120 sample shipment to the LNSP which is the national reference laboratory. If a case is confirmed, a  
121 team including biologists from LNSP and epidemiologists from DELM is commissioned to go  
122 into the outbreak area to conduct intensive field investigations consisting of identification of  
123 contacts and that of new suspected cases, data collection, sampling (including whole blood, skins  
124 lesion crusts or skin swabs) and rapid samples’ transfer to the LNSP for molecular diagnosis.  
125 From January to April 2024, a total of 61 samples collected from suspected cases were received  
126 at the LNSP. Suspected cases were from Brazzaville (9 cases), Cuvette centrale (23 cases),  
127 Likouala (10 cases), Plateaux (4 cases) and Pointe-Noire (25 cases).

128

### 129 **Real-time PCR screening of the samples**

130 For all the samples, samples were handled in a class III biosafety cabinet, DNA was extracted  
131 using the QIAamp DNA Mini Kit (Qiagen, Hilden, Germany), following the manufacturer’s  
132 instructions. Extracted DNA was subsequently used for molecular diagnosis. Real time PCR  
133 assays were performed using the Monkeypox Virus Real Time PCR Kit (Shanghai ZJ Bio-Tech  
134 Co., Ltd. (“Liferiver”), China) according to manufacturer’s instructions. Of the 61 samples,  
135 MPXV DNA was detected in 35 (57.37%), and based on the study criteria, 31 samples were  
136 selected and stored at -20°C until further used for genomic sequencing under the current study.

137

### 138 **MPXV sequencing**

### 139 **Amplicon sequencing**

140 For sequencing of the positive samples, we used previously published methods (Ochwoto et al.,  
141 2024, in preparation). Briefly, after the presence of PCR products were verified using gel  
142 electrophoresis, the five PCR products were pooled together, and subject to end repair (NEB,  
143 US) and barcoding (ONT, UK). Next, samples were cleaned with 0.4x volume AMPure XP  
144 beads (Beckman, US) and eluted in 30  $\mu$ L of 10 millimolar Tris pH 8.0. Then sequencing  
145 adapters were ligated to the barcoded amplicons using 5  $\mu$ L of Adapter Mix AMII (ONT), 5  $\mu$ L  
146 of Quick T4 DNA Ligase (NEB, US) and 10  $\mu$ L of NEBNext Quick Ligation Reaction Buffer 5x  
147 (NEB, US) to 30  $\mu$ L of the barcoded amplicon pool. Following a twenty-minute incubation at  
148 room temperature, samples were cleaned again using AMPure XP beads (Beckman) and DNA  
149 was eluted in 15  $\mu$ L of Elution Buffer (ONT, UK). DNA libraries were then quantified using the  
150 Qubit High Sensitivity dsDNA assay according to manufacturer's instructions (Thermofisher,  
151 US). Libraries were sequenced on Oxford Nanopore's GridION (ONT, UK) using FLO-  
152 MIN106-D flow cell (ONT, UK) in accordance with the manufacturer's protocol. FASTQ files  
153 were processed through Mpox-seek pipeline (<https://openomics.github.io/Mpox-seek/#citation>)  
154 for read quality control, adapter trimming, consensus sequence, and phylogenetic tree generation.

155

### 156 **Full genome sequencing**

157 To determine the type of single nucleotide polymorphisms (SNPs) in these novel sequences we  
158 further recovered the complete genomes of the sequences. First, the quality of the DNA was  
159 assessed on the Agilent TapeStation 4200 (Agilent Technologies, Inc., USA) using genomic  
160 tapes/reagents. One hundred nanograms of DNA was sheared to an average size of 550bp using  
161 the Covaris LE220 (Covaris, LLC, MA) and final libraries were prepared using the Illumina  
162 TruSeq DNA Nano v2 protocol (Illumina, USA) with 8 cycles of PCR amplification using 6ul of

163 IDT/Illumina-TruSeq UD Indexes as barcoded primers. Final libraries were cleaned using an  
164 80% vol of AMPureXP beads (Agencourt, USA), visualized on a BioAnalyzer HS chip (Agilent  
165 Technologies, Inc., USA), and quantified using the Kapa SYBR FAST Universal qPCR kit for  
166 Illumina sequencing (Kapa Biosystems, USA) on the CFX384 Real-Time PCR Detection System  
167 (Bio-Rad Laboratories, Inc, USA) and Qubit Fluorometer (Thermo Fisher Scientific, USA).  
168 Libraries consisting of 40-250 ng of DNA were pooled into three pools (according to amount of  
169 DNA and Ct value of sample). Viral sequences were captured using the HyperCap enrichment kit  
170 (Roche Diagnostic Corp., USA), and final library was cleaned, analyzed using the Agilent  
171 bioanalyzer and quantified using the Kapa SYBR FAST Universal qPCR as above. Each of the 3  
172 captured-library pools were diluted to a final concentration of 2 nM and pooled equimolarly. This  
173 final, MPXV DNA-captured, library pool was denatured and diluted to a 10.5 pM stock and a  
174 paired-end 2 x 250 cycle sequencing was carried out on the MiSeq using a V2 flow cell and 500  
175 cycle chemistry.

176 After sequencing, raw fastq reads were trimmed of adapter sequences using Cutadapt v. 1.12<sup>18</sup>  
177 and filtered for quality using Fastx Toolkit v. 0.0.14<sup>19</sup>. Reads were then screened against the  
178 human genome to remove host reads. Remaining reads for one of the sample were then de novo  
179 assembled using SPAdes v. 3.15.5<sup>20</sup>. Resulting contigs were manually assembled to create the  
180 full-length genome. Assembly errors were corrected automatically using multiple rounds of pilon  
181 v. 1.22<sup>21</sup> and manual correction. The resulting assembly was then used for reference assembly of  
182 the remaining genomes using Bowtie2 v. 2.2.9<sup>22</sup> followed by multiple rounds of correction using  
183 pilon v. 1.22.

184

185 **Phylogenetic analysis**



186 Full length genomes of old Clade I MPXV sequences were obtained from GISAID database  
187 (<https://www.gisaid.org/>) and recent sequences from the Kamituga outbreak were obtained from  
188 Github ([https://github.com/inrblabgenpath/Mpox\\_sequencing\\_Kamituga](https://github.com/inrblabgenpath/Mpox_sequencing_Kamituga)). Clade Ib MPXV from  
189 GISAID were used as outgroup. All sequences were trimmed to the required region and  
190 alignments were built using MAFFT (FFT-NS-1 algorithm)<sup>23</sup>, with the best model for distance  
191 estimates identified with the ModelFinder function<sup>24</sup> as the one with the lowest Bayesian  
192 information criterion (BIC). Maximum likelihood phylogenetic tree was constructed using IG-  
193 TREE2<sup>25</sup> and branch support was assessed using both ultrafast bootstrap approximation (ufBoot,  
194 1000 replicates)<sup>26</sup> and SH-like approximate likelihood ratio test (SH-aLRT). The tree was  
195 visualized in FigTree (<http://tree.bio.ed.ac.uk/software/figtree/>) and rooted using Clade Ib  
196 sequences. Only bootstrap values greater than 69% are shown. Bars indicate nucleotide  
197 substitutions per site.

198 Furthermore, we utilized the full genomes to perform ancestral reconstruction for each internal  
199 node on phylogeny, enabling mapping of single nucleotide polymorphisms (SNPs) along  
200 branches following recently developed method<sup>27</sup>. SNPs were categorized according to their  
201 consistency with the APOBEC3 editing signature, which is characterized by specific mutations  
202 (TC → TT and GA → AA). To estimate the date when the non-Kamituga MPXV genomes  
203 (putative Clade Ib) outbreak in DRC and RoC started, we excluded all Kamituga MPXV  
204 genomes and assumed non-APOBEC3 rate of evolution and used strict molecular clock with  
205 constant model implemented in BEAST v. 1.10.4<sup>28</sup>. For each analysis, three independent chains  
206 of 100 million generations (sampled every 100,000 states) were run to ensure convergence and  
207 then combined with appropriate burn-in. Statistical uncertainty was reflected in values of the  
208 95% highest probability density (HPD). The chains were then combined with LogCombiner v.

209 1.10.4. For all subsequent analyses, we assessed convergence using Tracer, and constructed a  
210 maximum clade credibility (MCC) tree (estimated from the posterior distribution of trees with  
211 node heights scaled to mean values and posterior probabilities showing the statistical support for  
212 individual nodes) in TreeAnnotator v. 1.10.4.

## 213 **Results**

214 A total of 31 Mpox confirmed cases between January and April 29, 2024, were included in this  
215 study. Demographic data of these participants are summarized in Table 1. Mpox positive cases  
216 were from Cuvette Centrale (19/31, 61%), Likouala (8/31, 26%), and Pointe Noire (5/31, 16%)  
217 (Figure 1A) with males being the majority of these confirmed MPXV infection cases (20/31,  
218 65%). The median age was 20 years (IQR 11-31) (Table 1). Children under 15 years constituted  
219 39% (12/31) of confirmed cases, individuals aged 15-30 years made up 35% (11/31), and those  
220 above 30 years accounted for 23% (7/31) of the cases. None of the individuals with confirmed  
221 Mpox had been vaccinated against smallpox.

222 Overall, cycle threshold (Ct) ranged between 13.4 and 37.4. Respectively, we recovered eleven,  
223 eight and one sequence from positive samples from Cuvette Centrale, Likouala and Pointe Noire  
224 Provinces (Figure 1A). Phylogenetic analysis (Figure 1B) revealed that MPXV strains sequenced  
225 from RoC are found in two major clusters within Clade Ia. The first is a more diverse cluster  
226 made up of four sequences from this study all recovered from samples from the RoC Cuvette  
227 Province clustering with two MPXV sequences from the current DRC outbreak (in Sud-  
228 Ubangi), three older sequences from Central African Republic sequenced between 2017 and  
229 2018, and seven sequences from DRC sequenced in 2006-07 and 2022. The second cluster is  
230 made up of 16 sequences from this study clustering with sequences from the current DRC  
231 outbreak (two sequences from Sud-Ubangil, two from Equateur and one from Kinshasa). The  
232 nucleotide similarity between sequences from RoC and DRC in this cluster ranged from 99.5 to

233 99.9%. Sequences from 2018-2022 MPXV samples from the Pokola in the Sangha Province in  
234 RoC clustered together with each other.

235

236 To analyze single nucleotide polymorphisms (SNPs) in these new sequences from the RoC, we  
237 subjected the MPXV DNA from these samples to full genome sequencing, which produced 14  
238 complete genomes: 8 from Cuvette Province and 6 from Likouala Province. All 14 genomes  
239 displayed consistent phylogenetic placement with the ~13Kb sequences (Supplementary Figure  
240 1A). Additionally, the proportion of APOBEC3-type mutations relative to other mutations in  
241 these sequences was 16.2% (11 of 68 observed mutations) (Supplementary Figure 1B). To  
242 estimate when these recent sequences from RoC were introduced into the human population, we  
243 conducted molecular clock analysis. This analysis revealed two clusters of sequences from RoC  
244 and the Democratic Republic of the Congo (DRC): the first cluster, which emerged around 2000,  
245 includes RoC sequences from Sangha (a past outbreak) and Cuvette (the current outbreak)  
246 regions, along with one DRC sequence from Sud-Ubangil Province. The second cluster, which  
247 emerged in 2005, comprises the remaining RoC samples from the current outbreak and five  
248 sequences from one of the ongoing DRC outbreaks, consistent with the ~13Kb sequences  
249 (Supplementary Figure 2).

250

## 251 **Discussion**

252 Human infection with MPXV was first recognized in 1970 in DRC, with historically sporadic  
253 Mpox outbreaks. The last decade has seen increasing frequency of Clade I Mpox cases in DRC  
254 <sup>11</sup>. The rise in the number of Mpox cases in DRC in 2023, their occurrence in new geographic  
255 areas, including outside Africa <sup>10,29,30</sup> resulted in second time Mpox was declared Mpox a public

256 health emergency of international concern by the WHO on August 14, 2024<sup>17</sup>. This increase in  
257 cases suggests either anthropogenic changes, behavior changes, virus changes, or a combination  
258 thereof driving the increased human-to-human transmission. During the ongoing Mpox epidemic  
259 in DRC, the neighboring RoC observed a sudden rise in the number of Mpox cases in 2024. This  
260 resulted to the declaration of a Mpox epidemic by the Ministry of Public Health of RoC in April  
261 24, 2024<sup>31</sup>. Molecular epidemiology, using pathogen sequencing data has been successfully used  
262 in Africa to trace the spread of emerging zoonotic pathogens such as Ebola virus and Lassa virus  
263<sup>32,33</sup>. To understand whether the increase in Mpox cases in RoC was driven by local emergence of  
264 MPXV or spillover from DRC, we implemented a novel next-generation sequencing approach  
265 using the Oxford Nanopore GridION platform.

266 The sequences of the Clade Ia MPXV from the RoC, obtained during the current outbreak cluster  
267 roughly in three separate lineages. The diverse phylogenetic positioning of the RoC MPXV  
268 sequences suggests the occurrence of multiple co-circulating strains in the human population and  
269 reflects the MPXV diversity observed during the ongoing outbreaks in DRC<sup>10</sup>. Genomic data  
270 from DRC demonstrates the co-circulation of multiple independent lineages, including Clade Ib,  
271 suggesting several independent spillover events from the natural reservoir<sup>30</sup>. The phylogenetic  
272 congruence of circulating MPXV lineages observed in cases from the regions of the DRC  
273 adjacent to the RoC suggests multiple independent introductions of MPXV into human  
274 populations within the RoC. These introductions could have resulted from direct zoonotic  
275 transmission of similar viral strains from a reservoir host into populations in both the DRC and  
276 RoC or through cross-border human-to-human transmission. The latter is supported by the  
277 observed 16% frequency of APOBEC3-like mutations in these new sequences, a significant  
278 increase from the 8% (38 out of 463 sequences) previously reported in other Clade I sequences

279 from the DRC and other endemic regions of Africa<sup>27</sup>. This increase in APOBEC3-like mutations  
280 suggests a marginally higher rate of human-to-human transmission in these recent cases  
281 compared to earlier reports. Consequently, this finding strengthens the argument for cross-border  
282 human-to-human transmission as a significant factor in the spread of MPXV. Given the  
283 magnitude of the outbreaks in the DRC, it is highly likely that the cases in the RoC represent  
284 spillover events from the DRC into the RoC. However, the available epidemiological data is  
285 insufficient to definitively confirm the directionality of Mpox transmission. The border areas  
286 between RoC and DRC are known for extensive connectivity of the populations, with major  
287 waterways connecting the region and major population centers such Mbandaka, Kinshasa and  
288 Brazzaville and Lingala as the common language. Given the frequent travel between RoC and  
289 DRC, there exists an elevated risk of trans-border transmission. Moreover, the clustering of  
290 sequences from Mpox cases across different provinces in RoC, including Cuvette, Likouala, and  
291 Pointe Noire, suggests probable local human-to-human transmission during the ongoing outbreak  
292 in RoC, however, the rate of this transmission compared to the observed Clade IIb and Ib MPXV  
293<sup>13,27</sup> might be lower.

294 The reported 35 cases likely represent an underestimate of the true prevalence of Mpox cases in  
295 RoC. Discussions with local healthcare workers reveal that many individuals exhibiting signs  
296 and symptoms of Mpox remain within the community without seeking medical attention. The  
297 drivers of the current human-to-human transmission in RoC are unknown, and follow-up  
298 epidemiological investigations and expanded surveillance are urgently needed to better  
299 understand the modes of MPXV transmission. In addition, it is currently unclear whether sexual  
300 contact transmission is contributing to the outbreak as has been observed in Sud Kivu region in  
301 DRC<sup>14</sup>. The sustained human-to-human transmission of clade I MPXV in the DRC and the

302 subsequent introduction into RoC, presents a significant cause for concern. This introduction into  
303 RoC from DRC, highlights the vulnerability of the region for cross border introductions  
304 potentially driving outbreaks over large geographical areas into bordering countries. We strongly  
305 advocate for increased international support to strengthen epidemiology and surveillance, real-  
306 time molecular tracking of MPXV in combination with broad scale availability of prophylactic  
307 and therapeutic countermeasures to prevent escalation into another global Mpox outbreak <sup>34</sup>.

308

### 309 **Acknowledgments**

310 This research was supported by the Intramural Research Program of the National Institute of  
311 Allergy and Infectious Diseases (NIAID), National Institutes of Health (NIH). We thank  
312 NIAID's Research Technology Branch for whole genome sequencing (Craig Martens and Kent  
313 D. Barbian) and for developing bioinformatic pipeline (Skyler Kuhn and Paul Schaughency). We  
314 equally thank Dr. Willibrord "Chief Willy" Shasha (USAID) and Dr. Kerton R. Victory (CDC),  
315 for in country technical support. We are thankful to WHO Congo for supporting biological  
316 sample transport system and providing real-time PCR kits. We also appreciate the logistic  
317 support from the US Embassy in RoC.

318

### 319 **Competing interests**

320 The authors declare that they have no conflict of interest.

321

### 322 **Ethics**

323 This study was carried out in accordance with the declaration of Helsinki and was approved by  
324 the Congolese Foundation for Medical Research Ethics committee (Avis  
325 n°053/CEI/FCRM/2024).

326

327 **Data availability and Visualization**

328 All novel sequences reported are submitted to GISAID.

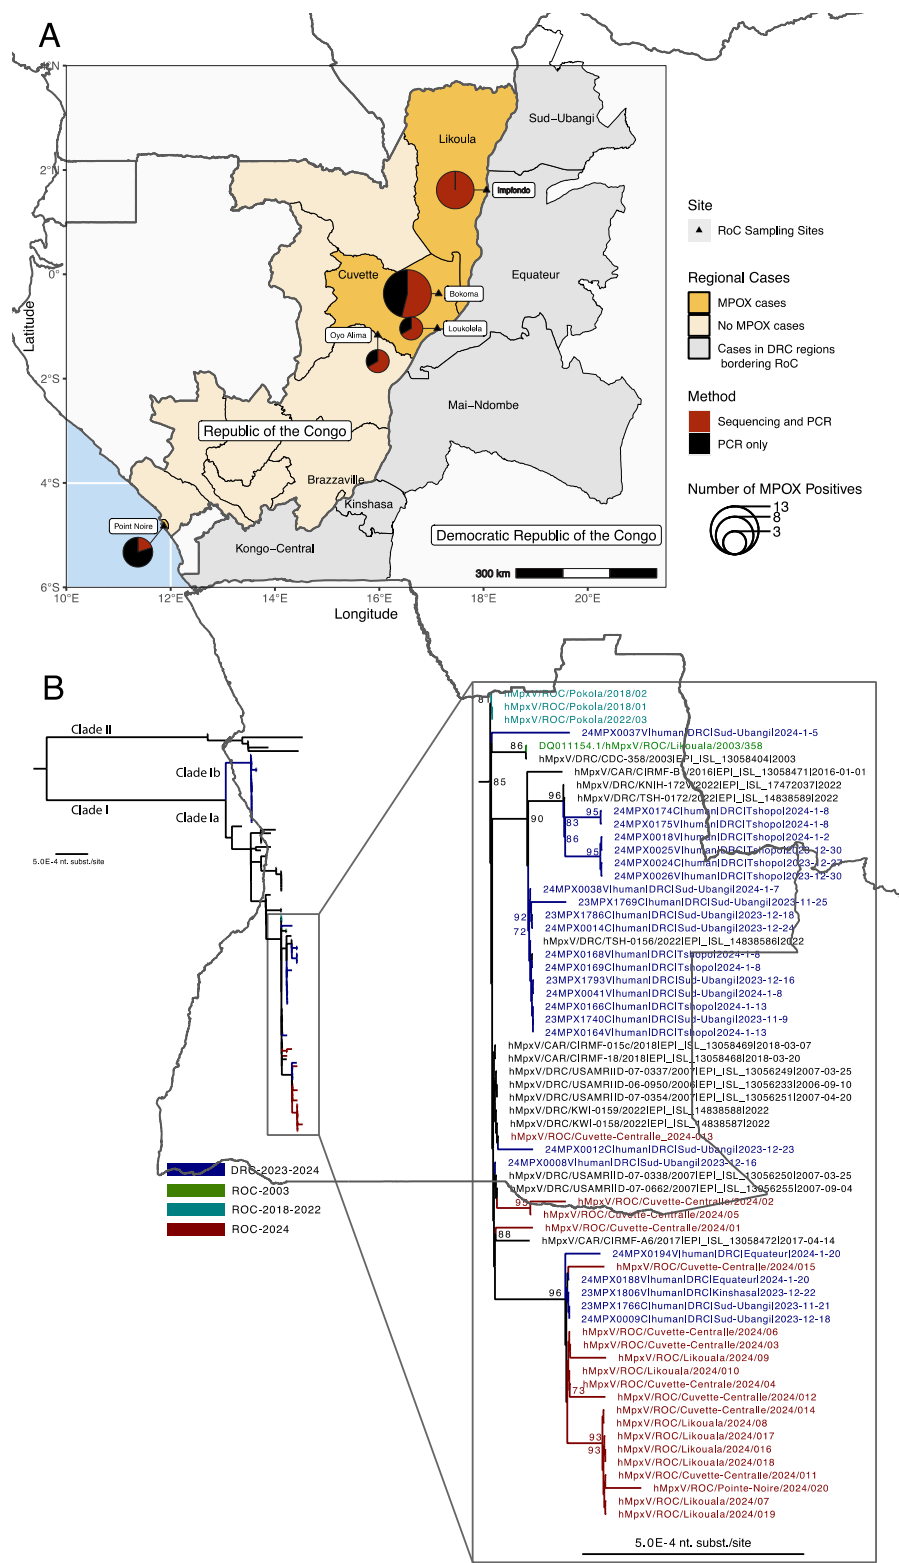

329  
330

331 **Figure 1: A.** Map of the Republic of the Congo (RoC) and the neighboring provinces of the  
332 Democratic Republic of the Congo (DRC). RoC regions with Mpx positive cases in yellow and



333 DRC grey. Size of the circle correspond with the number of cases, whereas the red to black ratio  
334 indicates the number of Mpox PCR positive samples for which sequencing information was  
335 obtained. **B.** Phylogenetic analysis of MPXV nucleotide sequences (~12kb from the 3' end)  
336 including historic and contemporary Clade I sequence. Alignments were built with MAFFT  
337 (FFT-NS-1 algorithm)<sup>23</sup>, with the best model for distance estimates identified with the  
338 ModelFinder function<sup>24</sup> as the one with the lowest Bayesian information criterion (BIC).  
339 Maximum likelihood phylogenetic tree was constructed using IG-TREE2<sup>25</sup> and branch support  
340 was assessed using both ultrafast bootstrap approximation (ufBoot, 1000 replicates)<sup>26</sup> and SH-  
341 like approximate likelihood ratio test (SH-aLRT). The tree was visualized in FigTree  
342 (<http://tree.bio.ed.ac.uk/software/figtree/>) and the phylogenetic tree were rooted using Clade II  
343 MPXV sequences. MPXV sequences obtained in this study are indicated in red. Whereas,  
344 historic RoC sequences are indicated in green, and contemporary DRC sequences from the  
345 current outbreaks are indicated in blue<sup>30</sup>. Node labels represent bootstrap values greater than 69,  
346 1,000 replicates. Scale bar indicates nucleotide substitutions per site.

347 Table 1: Demographic characteristics of Mpox confirmed cases.  
348

| ID          | Sequence ID/Accessions              | Date   | Gender | Age range | Department       | Sample type | Ct-value | Full genome recovery |
|-------------|-------------------------------------|--------|--------|-----------|------------------|-------------|----------|----------------------|
| MPOX-CG-006 | hMpxV/ROC/Cuvette-Centrale/2024/01  | Feb-24 | M      | 11-15     | Cuvette-Centrale | Skin lesion | 16.43    | Y                    |
| MPOX-CG-010 | hMpxV/ROC/Cuvette-Centrale/2024/02  | Mar-24 | M      | 6-10      | Cuvette-Centrale | Skin lesion | 21.78    | Y                    |
| MPOX-CG-014 | hMpxV/ROC/Cuvette-Centrale/2024/03  | Feb-24 | F      | 36 - 40   | Cuvette-Centrale | Skin lesion | 18.26    | Y                    |
| MPOX-CG-015 | hMpxV/ROC/Cuvette-Centrale/2024/04  | Mar-24 | M      | 26-30     | Cuvette-Centrale | Skin lesion | 16.43    | Y                    |
| MPOX-CG-023 | hMpxV/ROC/Cuvette-Centrale/2024/05  | Mar-24 | F      | 0-5       | Cuvette-Centrale | Skin lesion | 20.29    | Y                    |
| MPOX-CG-025 | hMpxV/ROC/Cuvette-Centrale/2024/06  | Mar-24 | F      | 21-25     | Cuvette-Centrale | Skin lesion | 15.96    | Y                    |
| MPOX-CG-043 | hMpxV/ROC/Likouala/2024/07          | Feb-24 | F      | 6-10      | Likouala         | Skin crust  | 15.42    | Y                    |
| MPOX-CG-045 | hMpxV/ROC/Likouala/2024/08          | Feb-24 | M      | NR        | Likouala         | Skin crust  | 16.82    | Y                    |
| MPOX-CG-061 | hMpxV/ROC/Likouala/2024/09          | Mar-24 | M      | 36-40     | Likouala         | Skin crust  | 13.36    | Y                    |
| MPOX-CG-062 | hMpxV/ROC/Likouala/2024/010         | Mar-24 | M      | 36-40     | Likouala         | Skin lesion | 19.01    | Y                    |
| MPOX-CG-011 | hMpxV/ROC/Cuvette-Centrale/2024/011 | Feb-24 | F      | 26-30     | Cuvette-Centrale | Skin lesion | 34.34    | N                    |
| MPOX-CG-013 | hMpxV/ROC/Cuvette-Centrale/2024/012 | Feb-24 | M      | 6-10      | Cuvette-Centrale | Skin lesion | 26.46    | Y                    |
| MPOX-CG-017 | hMpxV/ROC/Cuvette-Centrale/2024/013 | Mar-24 | M      | 46-50     | Cuvette-Centrale | Skin lesion | 22.78    | Y                    |
| MPOX-CG-026 | hMpxV/ROC/Cuvette-Centrale/2024/014 | Mar-24 | F      | 21-25     | Cuvette-Centrale | Blood       | 33.74    | N                    |
| MPOX-CG-027 | hMpxV/ROC/Cuvette-Centrale/2024/015 | Feb-24 | F      | 36-40     | Cuvette-Centrale | Blood       | 33.74    | N                    |
| MPOX-CG-035 | hMpxV/ROC/Likouala/2024/16          | Feb-24 | M      | 11-15     | Likouala         | Skin lesion | 32.39    |                      |
| MPOX-CG-036 | hMpxV/ROC/Likouala/2024/017         | Feb-24 | M      | NR        | Likouala         | Skin lesion | 21.78    | Y                    |
| MPOX-CG-042 | hMpxV/ROC/Likouala/2024/018         | Feb-24 | F      | 6-10      | Likouala         | Skin crust  | 23.29    | Y                    |
| MPOX-CG-044 | hMpxV/ROC/Likouala/2024/019         | Feb-24 | M      | 11-15     | Likouala         | Skin crust  | 27.2     | N                    |
| MPOX-CG-046 | hMpxV/ROC/Pointe-Noire/2024/020     | Feb-24 | M      | 16-20     | Pointe-Noire     | Blood       | 33.44    | N                    |
| MPOX-CG-019 | NS                                  | Mar-24 | F      | 26-30     | Cuvette-Centrale | Skin lesion | 37.44    | N                    |
| MPOX-CG-020 | NS                                  | Mar-24 | F      | 26-30     | Cuvette-Centrale | Blood       | 35.96    | N                    |
| MPOX-CG-022 | NS                                  | Mar-24 | M      | 26-30     | Cuvette-Centrale | Blood       | 35.83    | N                    |
| MPOX-CG-048 | NS                                  | Feb-24 | M      | 16-20     | Pointe-Noire     | Skin lesion | 34.71    | N                    |
| MPOX-CG-049 | NS                                  | Feb-24 | F      | 11-15     | Pointe-Noire     | Skin crust  | 35.56    | N                    |
| MPOX-CG-024 | NS                                  | Feb-24 | F      | 0-5       | Cuvette-Centrale | Blood       | 34.34    | N                    |
| MPOX-CG-007 | NS                                  | Mar-24 | M      | 11-15     | Cuvette-Centrale | Blood       | 36       | N                    |
| MPOX-CG-012 | NS                                  | Feb-24 | M      | 0-5       | Pointe-Noire     | Skin lesion | 34.34    | N                    |
| MPOX-CG-008 | NS                                  | Feb-24 | M      | 31-35     | Cuvette-Centrale | Blood       | 37.09    | N                    |
| MPOX-CG-016 | NS                                  | Feb-24 | M      | 26-30     | Cuvette-Centrale | Blood       | 35.96    | N                    |
| MPOX-CG-018 | NS                                  | Mar-24 | M      | 46-50     | Cuvette-Centrale | Blood       | 35.83    | N                    |

349 NR: age range not recorded, NS: No sequences obtained due to low viral load or poor sequence quality, M = male, F = female, Y  
350 = full genome recovery successful, N = full genome recovery failed.

351

## 352 **References**

- 353 1. Hughes AL, Irausquin S, Friedman R. The evolutionary biology of poxviruses. *Infection, Genetics and*  
354 *Evolution* 2010; **10**(1): 50-9.
- 355 2. McCollum AM, Shelus V, Hill A, et al. Epidemiology of Human Mpox - Worldwide, 2018-2021. *MMWR*  
356 *Morb Mortal Wkly Rep* 2023; **72**(3): 68-72.
- 357 3. Altindis M, Puca E, Shapo L. Diagnosis of monkeypox virus - An overview. *Travel Med Infect Dis* 2022;  
358 **50**: 102459.
- 359 4. Bunge EM, Hoet B, Chen L, et al. The changing epidemiology of human monkeypox-A potential threat? A  
360 systematic review. *PLoS Negl Trop Dis* 2022; **16**(2): e0010141.
- 361 5. Hens M, Brosius I, Berens-Riha N, et al. Characteristics of confirmed mpox cases among clinical suspects:  
362 A prospective single-centre study in Belgium during the 2022 outbreak. *New Microbes New Infect* 2023; **52**: 101093.
- 363 6. WHO. WHO Director-General declares the ongoing monkeypox outbreak a Public Health Emergency of  
364 International Concern. 2022. [https://www.who.int/europe/news/item/23-07-2022-who-director-general-declares-the-](https://www.who.int/europe/news/item/23-07-2022-who-director-general-declares-the-ongoing-monkeypox-outbreak-a-public-health-event-of-international-concern)  
365 [ongoing-monkeypox-outbreak-a-public-health-event-of-international-concern](https://www.who.int/europe/news/item/23-07-2022-who-director-general-declares-the-ongoing-monkeypox-outbreak-a-public-health-event-of-international-concern) (accessed 9/19/2022 2022).
- 366 7. Doshi RH, Guagliardo SAJ, Dzabatou-Babeaux A, et al. Strengthening of Surveillance during Monkeypox  
367 Outbreak, Republic of the Congo, 2017. *Emerg Infect Dis* 2018; **24**(6): 1158-60.
- 368 8. Doshi RH, Guagliardo SAJ, Doty JB, et al. Epidemiologic and Ecologic Investigations of Monkeypox,  
369 Likouala Department, Republic of the Congo, 2017. *Emerg Infect Dis* 2019; **25**(2): 281-9.
- 370 9. Learned LA, Reynolds MG, Wassa DW, et al. Extended interhuman transmission of monkeypox in a  
371 hospital community in the Republic of the Congo, 2003. *Am J Trop Med Hyg* 2005; **73**(2): 428-34.
- 372 10. Masirika LM, Udahemuka JC, Schuele L, et al. Ongoing mpox outbreak in Kamituga, South Kivu  
373 province, associated with monkeypox virus of a novel Clade I sub-lineage, Democratic Republic of the Congo,  
374 2024. *Euro Surveill* 2024; **29**(11).
- 375 11. Ladnyj ID, Ziegler P, Kima E. A human infection caused by monkeypox virus in Basankusu Territory,  
376 Democratic Republic of the Congo. *Bull World Health Organ* 1972; **46**(5): 593-7.
- 377 12. Rimoin AW, Mulembakani PM, Johnston SC, et al. Major increase in human monkeypox incidence 30  
378 years after smallpox vaccination campaigns cease in the Democratic Republic of Congo. *Proceedings of the*  
379 *National Academy of Sciences* 2010; **107**(37): 16262-7.

- 380 13. Vakaniaki EH, Kacita C, Kinganda-Lusamaki E, et al. Sustained human outbreak of a new MPXV clade I  
381 lineage in eastern Democratic Republic of the Congo. *Nature Medicine* 2024.
- 382 14. Kibungu E, Vakaniaki E, Kinganda-Lusamaki E, et al. Clade I–Associated Mpox Cases Associated with  
383 Sexual Contact, the Democratic Republic of the Congo. *Emerging Infectious Disease journal* 2024; **30**(1): 172.
- 384 15. Web R. DR Congo: Rapport de la situation épidémiologique de la variole simienne - sitrep no 2, 5-11 février  
385 2024, 2024.
- 386 16. Control) EECfDPa. Risk assessment for the EU/EEA of the mpox epidemic caused by monkeypox virus  
387 clade I in affected African countries. 2024.
- 388 17. Organization WH. WHO Director-General declares mpox outbreak a public health emergency of  
389 international concern. 2024. p. [https://www.who.int/news/item/14-08-2024-who-director-general-declares-mpox-](https://www.who.int/news/item/14-08-2024-who-director-general-declares-mpox-outbreak-a-public-health-emergency-of-international-concern)  
390 [outbreak-a-public-health-emergency-of-international-concern.](https://www.who.int/news/item/14-08-2024-who-director-general-declares-mpox-outbreak-a-public-health-emergency-of-international-concern)
- 391 18. Martin M. Cutadapt removes adapter sequences from high-throughput sequencing reads. *2011* 2011; **17**(1):  
392 3.
- 393 19. Gordon A. FASTX-Toolkit (RRID:SCR\_005534). [http://hannonlab.cshl.edu/fastx\\_toolkit/](http://hannonlab.cshl.edu/fastx_toolkit/).
- 394 20. Bankevich A, Nurk S, Antipov D, et al. SPAdes: a new genome assembly algorithm and its applications to  
395 single-cell sequencing. *J Comput Biol* 2012; **19**(5): 455-77.
- 396 21. Walker BJ, Abeel T, Shea T, et al. Pilon: An Integrated Tool for Comprehensive Microbial Variant  
397 Detection and Genome Assembly Improvement. *PLOS ONE* 2014; **9**(11): e112963.
- 398 22. Langmead B, Salzberg SL. Fast gapped-read alignment with Bowtie 2. *Nat Methods* 2012; **9**(4): 357-9.
- 399 23. Katoh K, Standley DM. MAFFT multiple sequence alignment software version 7: improvements in  
400 performance and usability. *Mol Biol Evol* 2013; **30**(4): 772-80.
- 401 24. Kalyaanamoorthy S, Minh BQ, Wong TKF, von Haeseler A, Jermin LS. ModelFinder: fast model selection  
402 for accurate phylogenetic estimates. *Nat Methods* 2017; **14**(6): 587-9.
- 403 25. Minh BQ, Schmidt HA, Chernomor O, et al. IQ-TREE 2: New Models and Efficient Methods for  
404 Phylogenetic Inference in the Genomic Era. *Molecular Biology and Evolution* 2020; **37**(5): 1530-4.
- 405 26. Hoang DT, Chernomor O, von Haeseler A, Minh BQ, Vinh LS. UFBoot2: Improving the Ultrafast  
406 Bootstrap Approximation. *Mol Biol Evol* 2018; **35**(2): 518-22.

- 407 27. O'Toole Á, Neher RA, Ndodo N, et al. APOBEC3 deaminase editing in mpox virus as evidence for  
408 sustained human transmission since at least 2016. *Science* 2023; **382**(6670): 595-600.
- 409 28. Drummond AJ, Rambaut A. BEAST: Bayesian evolutionary analysis by sampling trees. *BMC Evol Biol*  
410 2007; **7**: 214.
- 411 29. Organization WH. Multi-country outbreak of mpox. External situation report#30 – 25 November 2023.,  
412 2023.
- 413 30. Vakaniaki EH, Kacita C, Kinganda-Lusamaki E, et al. Sustained Human Outbreak of a New MPXV Clade I  
414 Lineage in Eastern Democratic Republic of the Congo. *medRxiv* 2024: 2024.04.12.24305195.
- 415 31. Reuters. Congo Republic declares mpox epidemic. 2024. p. ROC mpox outbreak.
- 416 32. Arias A, Watson SJ, Asogun D, et al. Rapid outbreak sequencing of Ebola virus in Sierra Leone identifies  
417 transmission chains linked to sporadic cases. *Virus Evol* 2016; **2**(1): vew016.
- 418 33. Kafetzopoulou LE, Pullan ST, Lemey P, et al. Metagenomic sequencing at the epicenter of the Nigeria 2018  
419 Lassa fever outbreak. *Science* 2019; **363**(6422): 74-+.
- 420 34. Nachega JB, Sam-Agudu NA, Ogoina D, et al. The surge of mpox in Africa: a call for action. *Lancet Glob*  
421 *Health* 2024.
- 422
